# Supplementary material for: Protein disulfide isomerases are promising targets for predicting the survival and tumor progression in glioma patients
Source: Aging (Albany NY). 2020 Feb 5;12(3):2347–72. doi: 10.18632/aging.102748 (PMC7041756; doi:10.18632/aging.102748)
Supplement: Supplementary Table 2 [file aging-12-102748-s002..pdf]

## SUPPLEMENTARY TABLES

Please browse Full Text version to see the data of Supplementary Tables 1

**Supplementary Table 1. Univariate and multivariate Cox regression analysis of factors affecting overall survival of patients.**

**Supplementary Table 2. Clinical information of glioma patients from TCGA and CGGA database.**

| Clinicopathological features | TCGA         | CGGA         |
|------------------------------|--------------|--------------|
|                              | n (n%)       | n (n%)       |
| Number of patients           | 641 (100%)   | 319 (100%)   |
| Subtype                      |              |              |
| Proneural                    | 229 (35.73%) | 101 (31.66%) |
| Classical                    | 79 (12.32%)  | 71 (22.26%)  |
| Neural                       | 108 (16.85%) | 81 (25.39%)  |
| Mesenchymal                  | 90 (14.04%)  | 66 (20.69%)  |
| NA                           | 135 (21.06%) | 0 (0.00%)    |
| MGMT                         |              |              |
| Methylation                  | 460 (71.76%) | \            |
| Unmethylation                | 150 (23.40%) | \            |
| NA                           | 31 (4.84%)   | \            |
| 1p19q                        |              |              |
| Codeletion                   | 165 (25.74%) | 67 (21.00%)  |
| Noncodeletion                | 472 (73.63%) | 245 (76.80%) |
| NA                           | 4 (0.63%)    | 7 (2.20%)    |
| IDH                          |              |              |
| Mutation                     | 417 (65.05%) | 174 (54.55%) |
| Wildtype                     | 217 (33.85%) | 145 (45.45%) |
| NA                           | 7 (1.10%)    | 0 (0.00%)    |
| Gender                       |              |              |
| Male                         | 371 (57.88%) | 198 (62.07%) |
| Female                       | 270 (42.12%) | 121 (37.93%) |
| Age                          |              |              |
| <45                          | 315 (49.14%) | 187 (58.62%) |
| ≥45                          | 326 (50.86%) | 132 (41.38%) |
| Grade                        |              |              |
| WHO grade II                 | 244 (38.07%) | 102 (31.97%) |
| WHO grade III                | 259 (40.41%) | 77 (24.14%)  |
| WHO grade IV                 | 137 (21.37%) | 136 (42.63%) |
| NA                           | 1 (0.15%)    | 4 (1.26%)    |
| Cancer type                  |              |              |
| LGG                          | 504 (78.63%) | 179 (56.11%) |
| GBM                          | 137 (21.37%) | 136 (42.63%) |
| NA                           | 0 (0.00%)    | 4 (1.26%)    |
